# Supplementary material for: Plasma metabonomics of classical swine fever virus-infected pigs
Source: Front Vet Sci. 2023 Dec 6;10:1171750. doi: 10.3389/fvets.2023.1171750 (PMC10734307; doi:10.3389/fvets.2023.1171750)
Supplement: Supplementary file 1 [file Table_1.xls]

## Sheet: Sheet1
rt_mz	compounds	mg1b	mg1c	mg1d	mg1e	mg1a	cs2-1DPI	cs3-1DPI	cs4-1DPI	cs5-1DPI	cs1-1DPI	cs2-3DPI	cs3-3DPI	cs4-3DPI	cs5-3DPI	cs1-3DPI	cs2-5DPI	cs3-5DPI	cs4-5DPI	cs5-5DPI	cs1-5DPI	cs2-7DPI	cs3-7DPI	cs4-7DPI	cs5-7DPI	cs1-7DPI	mg2b	mg2c	mg2d	mg2e	mg2a	Qc1	Qc2	Qc3	Qc4
group		mg1（mock-infected group 1DPI)					cs-1DPI (CSFV-infected group 1DPI)					cs-3DPI (CSFV-infected group 3DPI)					cs-5DPI (CSFV-infected group 5DPI)					cs-7DPI (CSFV-infected group 7DPI)					mg2（mock-infected group 3DPI)					qc	qc	qc	qc
8.09_119	alanine-13C3-15N	11740924	10427453	9878635	12259364	9457729	10087756	8796739	7990245	11830863	9629227	9257610	10541326	11380216	10829091	9201468	10240701	11356583	12395722	10012030	10554532	8712977	8616988	9078890	10009701	8919062	10127829	12087213	9294742	12114776	10586069	7279093	8884344	8691619	9231798
10.34_149	valine-13C5-15N	12964559	12695479	13404056	13483697	11945662	12455442	12733500	13402298	13742422	11665744	12234552	12786862	13121286	13992212	11765554	12397865	12981759	13291004	13764587	12112159	12543224	12887832	12225443	13881262	11970643	12461784	12896455	12996137	13494323	12310933	10952171	11884812	12517134	13243765
11.51_163	leucine-13C6	5636173	5972672	6298509	6270932	5311996	5666978	5897315	6015613	5491457	5344582	4877616	5198453	5898732	5385386	5005282	5148493	5260764	6092320	6067932	5128954	5054367	5175523	5613574	6037859	4816841	5618620	5954470	6185218	5852674	5370973	4047086	4576506	4844115	5005817
11.98_164	isoleucine-13C6-15N	7543632	7396920	7956292	7836124	6547853	7104508	7009225	7727488	7676078	6844271	5532079	7290975	7450412	7622534	5450566	6681572	6978032	7616179	8053988	7193943	6781542	7009628	7127763	8031612	6456572	7264283	7285403	7638742	7920227	6932789	6115607	6695333	7326195	7332370
18.66_221	13C9-15N-phenylalanine	380357	369855	402763	487119	301122	290873	280318	340962	600962	258691	460694	576047	518895	484414	492845	501163	520867	492814	634621	432200	374866	486655	357267	487811	418645	314006	389038	419964	482260	312020	249195	337646	416802	427869
22.74_217	dulcitol	3822815	3764679	4107179	4072813	3631592	3754402	3840174	4026458	4163284	3616160	3609062	3886432	3894273	4171015	3592513	3858706	3952580	3915481	4157071	3702450	3818804	3921619	3901577	4251864	3606070	3834670	3946507	3928717	4036391	3662152	3562754	3806658	4071653	4127983
6.4_121		1194624	1212448	1170179	1307813	1099873	1169255	1224407	1265762	1325808	1098428	1132410	1235534	1204764	1347121	1081815	1147724	1220588	1321602	1244729	1223966	1156240	1205328	1320177	1316938	1183368	1137775	1230796	1237332	1295239	1108767	926815	1052989	1113064	1170736
6.63_174	1-propanamine	47238	48966	48988	50809	45766	46305	52740	52208	53344	48847	48978	49858	52926	52644	48261	46673	50997	49324	52519	49933	49408	52268	51150	55143	47353	47463	49973	48886	51213	46821	41771	49058	47114	51378
6.76_174		172542	185466	187561	184406	175127	143049	135878	149670	170281	146530	173168	181079	124688	150138	195593	183335	198092	139132	179221	195428	170601	161204	183501	232506	162096	173251	165802	194123	192972	175310	137229	143392	164133	154879
6.94_152	2-hydroxypyridine	1259089	1341338	1416644	1457689	1245209	1199955	1281667	1378427	1387733	1136167	1288378	1248914	1271988	1279331	1219601	1434013	1344038	1303391	1478922	1295900	1379958	1349410	1353873	1496367	1310320	1265000	1255604	1461628	1426333	1184954	1253333	1291335	1410922	1335884
7.08_229		26830	29234	30983	35966	28747	25731	23022	28495	35686	24968	18964	28588	27695	30520	18427	20552	27874	30465	38704	24010	24946	30957	36563	47146	28861	23994	26262	34245	37841	27605	23789	24206	26477	30623
7.14_174	pyruvic acid	1553135	1975907	1168741	2648702	1355952	1274251	2450653	1230115	1925651	2341180	1996367	2282871	1908266	2368018	2199203	1280397	1476705	1793657	1582824	1450501	2137711	1822239	1661157	1744463	3353668	1588024	2556796	1170331	2065127	2009665	1903129	2130651	2273475	2299957
7.36_219		3549119	3019543	1768996	4443416	2948571	3053327	2734711	1487230	4222123	2867260	2152396	2081844	2163388	3895663	2387710	1194593	1523332	1802734	2049478	1422604	1757489	1561626	1638431	1579090	2758252	2726661	3835739	1776734	3938999	4492355	2572873	2838735	3066076	3014883
7.43_190		50533	92297	151500	32055	101179	61544	140580	154513	51765	74523	176234	147751	168562	79442	121527	244123	217305	170630	165290	173579	184446	197347	133295	159428	118983	80205	46803	155075	65351	54321	134471	141287	149608	150832
7.61_173	hexanoic acid	4504	5340	6364	4824	4132	5232	5241	6068	4524	4446	5332	4212	6730	4661	4771	6351	5847	8006	6014	4928	6073	5701	8438	5978	3953	4892	4395	4612	5079	4173	5300	5428	5694	5957
7.61_177	glycolic acid	14546	18492	15431	17155	12255	12772	26424	15435	18019	11574	19789	17493	15978	18555	14337	18403	18965	15872	19692	15736	25281	22740	18818	24324	17823	14013	15626	14089	15783	12251	16069	18435	17537	19626
7.8_217		14020	16130	18746	25717	14785	17416	23250	24539	22454	16464	15205	20283	24563	25081	13022	12956	18259	23766	24621	10945	15596	18778	23819	22897	12121	15471	17458	20656	22417	16759	15292	17350	21739	21026
8.09_116	alanine	4258334	3072086	3155745	7531241	3609464	2760820	2994855	2247333	7301671	3961488	2729315	2593514	2151597	5435304	2836236	3326463	2768156	2062040	3115322	3031459	2623919	2456472	2559806	3444515	3729105	4311916	4752758	3896705	5438834	4848458	2945960	3897818	3903335	4110674
8.21_186	2-ketoisovaleric acid 1	7483	15296	11609	12960	4937	9669	18385	16036	9497	14072	10312	15139	17173	13571	13842	13395	14732	13802	16769	15864	18628	11874	11716	15762	23775	10439	14024	11582	12077	5440	13835	15372	17491	18127
8.47_102	glycine (2tms)	859705	122248	39563	102927	1810029	130387	30537	3656	15575	143518	13280	4843	1817	10868	74861	13891	5624	2194	2751	120247	10871	2963	2661	10491	80863	298591	141523	75290	34865	1109441	469261	49986	35662	5862
8.5_245		52188	52118	45091	65123	40098	42818	40305	43002	96003	38037	148550	96578	57735	72303	142374	120190	131245	57199	85346	97707	87015	88275	71845	87020	79871	55564	53795	55713	71653	50486	55454	71510	90412	88294
8.52_131	2-hydroxybutyric acid	113638	781412	147915	55312	48250	367710	292522	341457	88284	413850	885415	1174619	710289	120894	1464808	1003376	1511952	428463	1517204	1304626	1242386	603213	542102	560714	1378796	143797	113660	90108	92066	30214	597629	673503	773921	746951
8.6_218	glyoxylic acid	14290	18302	26720	24138	14662	14410	17416	26222	21013	14583	17362	13132	23847	21322	14513	24153	16802	27054	22860	16987	21402	22792	15163	18281	18945	15645	19373	21585	23528	15574	16518	18741	20094	25982
8.68_130		44259	46640	55291	57313	37625	46707	49877	58486	55152	42485	48357	52516	65697	63337	43419	56268	52636	63472	64491	49457	50854	58322	57127	62494	47376	42064	50430	59707	56996	40349	41729	46998	57630	59660
8.69_202	2-ketoisovaleric acid 2	10516	18250	13900	15960	6321	11127	23203	20251	12274	16872	13321	18019	20068	16343	16224	16878	18630	16702	20817	18361	21298	12988	12984	19550	30983	12639	18878	14392	14760	6178	16161	18750	20725	20784
8.76_232		28953	24928	12298	40268	22441	24205	21329	9642	33620	24056	17871	15419	16506	35585	19314	8025	11053	14827	14858	9303	12343	10194	10543	11312	22131	20934	36729	14323	32908	40335	18723	22635	24869	22363
8.96_191		45538	44308	42341	47582	40156	49328	48674	45402	52228	46524	46422	49106	51219	57887	41711	36813	43860	48377	46496	35032	40536	45996	55461	50415	43192	47424	47873	41613	52421	40248	36089	39874	46463	50712
8.99_234		69262	71885	80708	78562	68051	69822	71213	78604	82468	62991	77161	71414	73312	70420	79124	94966	86299	81000	88710	87390	91164	87239	76007	89551	87099	72107	74375	84931	80172	68208	80531	74773	91451	82074
9.21_233	3-hydroxybutyric acid	77592	98631	65483	70864	35538	94242	68784	101840	218059	72531	155021	143484	179276	152139	211713	167280	167531	110710	136085	163881	162032	117484	92709	121243	199590	88315	65260	86849	86939	45616	118514	135965	153884	150877
9.26_145	2-hydroxyisovaleric acid	22043	46629	28058	25716	15010	27226	45318	31553	34414	35288	79325	69916	36360	50554	93770	67327	79173	35742	153830	86006	78255	52373	31842	113169	128333	35377	40235	37978	40193	34521	58129	64138	69799	72574
9.44_130	2-aminobutyric acid	125114	265205	225588	84912	62667	284840	104395	521671	147000	316534	411392	419334	793989	35080	1121899	563558	452408	555616	486287	812182	347423	137576	245001	217101	508818	73506	37125	147626	94827	34449	228960	277802	323189	332588
9.46_180		6145	14066	4710	7357	10350	3863	9533	4073	8143	4995	10488	13551	5459	6354	3329	8729	13548	5570	5683	4440	9516	8322	5259	4938	4679	3801	13745	4836	7212	7235	10227	13734	12177	6647
9.48_215		20052	19627	22404	20679	17050	18876	20673	20329	21429	18355	18561	20107	20422	20295	18398	19566	19685	21289	22016	21111	20239	20217	19715	24044	19423	18593	21068	20685	21576	17712	16844	16771	19444	20175
9.57_89	3-methyl-2-ketovaleric acid 1	77089	121753	104062	128857	49977	78014	118043	104427	76843	114443	54170	91458	107164	97474	65168	113351	112383	84410	122051	131975	150382	126172	66818	126359	194563	88240	125108	101895	90679	50192	106117	120757	137973	144570
9.66_241	methylphosphate	102491	107295	94239	98035	83809	79654	96399	89580	124848	87163	221602	204815	97176	97679	325587	150172	162480	76649	125050	143928	92911	104915	66595	140050	104406	93429	114889	114244	116037	96081	71839	59226	70881	89448
9.76_132		1133128	996999	1012802	1196362	976986	1065328	997331	999757	1184924	1032287	750728	923147	1069935	1186442	853656	829478	911467	1090710	1087876	845243	956690	1039086	923084	1083181	1010225	968634	1125536	1122127	1344831	1060464	915631	995775	1019356	1070162
9.83_211		48290	58539	42431	61546	46254	31463	42831	27561	54436	31311	46762	38903	26567	49361	47869	63018	58953	46107	77569	55568	58090	58419	55063	89433	57908	41145	53997	41095	60937	48039	45393	43295	49927	52813
9.99_262		13347	11285	9959	7748	14426	10559	9339	6865	11688	10720	23625	21126	13239	13666	24888	21753	21627	12141	13106	19601	9899	13364	8605	10648	13796	12274	7740	13978	10936	6160	10377	12610	14222	12433
10_200	3-methyl-2-ketovaleric acid 2	19238	34069	27041	32803	12647	19790	33342	25335	19635	30519	13260	22895	25449	23172	15222	27431	29270	19265	28649	35650	37501	32379	16220	34162	52879	23402	33905	25286	22088	11146	25577	30729	33027	32974
10.14_174		24071	25113	21481	22859	21159	20155	20738	21846	22038	21253	24864	25880	21155	24484	27289	26929	24763	23268	24663	25965	20555	22021	23093	26826	19882	22111	24366	23971	24513	20399	16258	18851	20577	20347
10.22_131	3-hydroxyisovaleric acid	19371	21014	17489	31194	16406	21042	14054	21015	43892	20627	53006	38445	27443	30381	93250	98182	80093	31396	52781	82876	80712	56523	32094	53959	77592	22099	19251	29005	35666	20232	39769	47232	51413	51219
10.31_200	2-ketoisocaproic acid	94598	151484	115995	189384	66361	98684	131187	134752	116249	145400	67305	116888	156614	132967	83275	137319	132407	124565	156895	149792	174049	120710	91084	144724	222926	125675	170813	154426	130733	70201	134247	152821	171033	166348
10.34_144	valine	3836416	4953410	3770269	4666037	3139666	4338719	4308064	4760946	7629492	4347889	4344800	4981128	7381470	6363029	6190269	5759292	4689537	5482100	7316679	6216255	6317372	4139800	5044763	6430340	7555774	4081147	4941805	5121666	5106360	3771981	5222154	5840952	6293189	6322231
10.43_266		12279	10824	9276	11620	7625	10671	8268	9674	13986	9114	12896	13521	11705	13569	12857	13690	15353	11179	13124	13701	11051	12696	12628	13040	11127	10623	9736	12345	12351	9038	7111	9196	10772	11808
10.61_103	2-ethyl-3-hydroxypropionic acid	4918	5497	5253	5539	5668	4676	4707	4508	8577	4017	6795	6102	5115	4679	9001	5773	6943	4939	5571	6621	6710	6556	5435	6766	7942	4907	3071	6597	5269	4498	5479	5693	6698	5784
10.79_277		8309	8355	10642	9619	7697	6896	8498	10030	8781	6348	11566	9094	9902	7508	12946	15552	13034	9852	11792	12172	11560	11377	8471	10970	11308	7916	7748	10808	9962	7219	9431	10079	13371	11759
10.85_278		15840	17598	17038	21209	7810	14936	17337	19244	16685	10983	17107	17039	20297	27164	11605	17693	17840	29921	20607	21204	15843	18051	17644	20124	13853	10261	21830	18054	23491	8758	9587	15723	16880	17399
10.92_151		13193	17275	20055	28277	19010	24927	22292	20728	26275	18598	10242	16047	24848	27127	12961	18759	16939	20472	21605	24966	14533	22905	17291	21300	17818	11414	13957	30440	27977	21591	10894	11757	14060	13477
10.95_117		57691	62934	63718	62720	62957	72319	141131	172501	151094	64425	97320	106249	159989	119051	86827	134166	159576	135913	168580	135089	108213	150601	118948	78574	99762	81748	82048	68894	75684	53558	117528	123390	124012	165978
11.02_189		294493	266549	248964	319496	340605	242528	243063	253779	337645	213336	511212	368484	364356	497885	553601	447147	440313	397367	310969	462788	382434	375369	318163	344912	464597	327199	391170	308984	330090	290390	303034	308455	319342	318044
11.17_179	benzoic acid	14012	15672	17322	15793	16906	14794	16241	18116	19362	14765	16785	13425	16141	16235	15549	15670	13466	14033	18137	13117	14695	14036	15265	14954	13320	19034	16012	19778	17933	15280	19526	21590	20442	21991
11.39_174	ethanolamine	155388	180690	156602	169377	92184	162822	227851	194842	182044	114448	300284	327433	235780	234236	298550	256701	279861	223410	196835	171145	179478	215554	187283	148698	189903	168118	193616	163612	203427	129518	195756	221575	265389	240342
11.45_319		52742	45145	49661	56091	45806	48644	40218	50390	73675	43024	102265	77420	67681	51237	108938	107648	105934	52542	73680	91691	101069	86327	60140	65034	88568	54113	41405	55293	54529	47633	69951	69811	95843	80171
11.52_158	leucine	2547248	3121987	2261047	3803570	2134575	2494639	1872758	2360486	4111651	2541415	1887938	2427837	4252460	3080807	3080392	3406299	2705843	3113983	3955919	3582571	3464821	2906139	2510193	3465771	4578979	2729546	2956400	3701307	3174876	2511869	2604782	2984175	3231753	3292573
11.59_205	glycerol	668152	1485211	906478	1000218	507755	837119	1055937	924607	880058	653588	422129	712741	853897	955675	695272	491768	994802	713311	909697	635495	284597	599758	539970	548880	370388	991242	1811237	470899	960508	351596	588337	665469	646946	819266
11.63_299	phosphate	31298367	27677648	29524345	29877241	25431637	28225408	26813778	29691036	36814771	30074334	28483676	26819867	27093958	47299323	33683779	28236217	32320019	29017602	36279838	19689114	20188513	22163125	25918630	31625835	16224878	29394996	29969674	25782568	35251170	32432245	29455541	30298731	35491297	34056262
11.71_280		138372	134480	144327	148764	122612	146836	123153	144421	153558	120559	130752	156458	137982	144794	130107	141755	150132	138304	151244	141678	141712	146177	157438	160649	136011	131255	133455	149088	14970	115267	104655	122996	140524	145332
11.86_184		4190	6388	9085	8492	3890	5330	7841	10276	8242	4505	5925	7635	13307	11395	5503	9855	8117	12170	12847	7445	8090	10277	7511	9755	6484	4372	8516	8930	8751	5480	4867	6611	10763	10522
11.9_158	norleucine	90592	123073	122498	97088	89191	69389	80472	77229	71459	101214	78615	85225	76303	47440	143966	96196	102911	81689	169006	193470	141798	86212	103042	176668	224690	63071	84021	114919	81674	91993	99899	117668	127889	123040
11.99_158	isoleucine	1976676	2416467	1948933	2441428	1625604	1757812	1465301	1657803	3062410	1766175	1162718	1900056	2718774	1991391	1921574	2363243	1975594	1832219	2650717	2670532	2727998	2706300	1423075	2704465	3372915	2006941	2008530	2390839	2172691	1636404	2061141	2284681	2674937	2523685
12.06_142	proline	3386690	2349175	2745666	4449588	3141359	1930685	1691559	1908673	6696765	1837269	1325683	1162858	1426136	2331318	1157893	1563133	1094620	1242419	1302116	1394549	1381939	1287646	1417062	1485178	1507195	3277444	3750278	4262555	3654978	3019388	2115791	2329013	2511564	2424774
12.12_245		11173	11430	12047	13942	9711	12431	12769	13370	13080	11427	10903	13315	12955	13112	17490	11359	13003	13836	14014	11919	11813	12614	14068	13541	12377	12020	11934	11857	13054	9917	9952	11816	12665	12623
12.23_174	glycine (3tms)	9423267	5183723	8819942	11255954	8404251	5845609	4638766	5921193	7506199	5481323	4977808	3386086	5321633	5583259	3430015	3925914	2983807	4537855	3747643	3222728	3021590	3277621	3927667	3422955	3206815	6892129	8150262	8878409	7824105	6439868	4237221	5747510	6423865	6185224
12.34_294		8695	8287	7198	9593	6457	8528	6818	8821	13283	6973	17192	15330	9177	11911	16726	16999	17695	9741	11338	15510	12124	14238	11851	13101	13229	8182	8400	9137	10466	6549	8565	10057	11745	11551
12.35_130		5812	11499	4831	9766	8679	3848	7456	NA	NA	5925	8369	NA	8411	7072	14158	10071	NA	NA	6061	NA	5122	4825	5587	6438	5930	10583	6547	10730	5731	3706	8900	7247	NA	8073
12.41_240		21519	23750	25169	24520	20817	19966	22542	25030	27070	19692	23574	23412	23551	24579	22964	28551	29031	24832	30104	22819	27849	26420	24962	27172	25517	22236	23671	26431	23328	22702	24368	25885	29643	28050
12.46_247	succinic acid	27180	25299	23187	30125	24564	22775	30124	21519	28359	24957	24861	26200	22608	39461	23621	27529	25620	20832	32822	24766	20220	23817	18151	22396	23238	26483	25822	32141	33040	43926	25503	29391	32357	33695
12.77_189	glyceric acid	28029	25707	27522	28190	24931	26309	26054	26828	36147	26539	55874	35520	28210	31761	56620	45609	45330	27224	33366	38179	30911	26341	29842	28027	26250	26950	31747	27429	26633	26621	28850	35359	37426	36502
12.96_241	uracil	18798	17962	17848	18649	14696	14149	23456	16732	18507	17044	76989	50448	25441	23603	121443	32026	28994	19987	23357	24286	28345	21036	15466	19749	23788	19171	20870	15540	16600	15103	20988	19604	25803	22694
13.03_292	4-deoxyerythronic acid	6019	5180	3859	4090	4945	6815	7162	5433	10949	7941	31375	17509	6762	9837	59630	19843	22765	5426	10243	18173	7114	12578	5856	6749	7810	5539	5526	5135	6297	4919	8972	10913	11257	11334
13.05_259	itaconic acid	98214	143044	181990	200222	137366	152084	142101	178048	187785	127897	167591	190443	216473	207263	134839	134980	169206	222304	231256	103380	140445	175468	216489	201345	114091	108584	131612	169933	188234	120902	116195	199867	180319	211647
13.18_259	methylmaleic acid	78699	119227	145681	131971	109639	96654	105917	128398	131163	100191	160961	173146	144459	133656	119425	126620	147496	150973	164344	90335	116753	141859	146107	148470	92323	81388	105156	125649	132233	94791	91928	212508	158396	170921
13.23_292	4-deoxythreonic acid	2325	3975	2556	2572	2734	4091	4597	4782	6284	6196	27133	24184	5501	5507	63549	23070	35517	6372	28864	25433	13990	8594	7943	12075	14464	2685	3297	3754	3617	3758	11220	11978	12679	13989
13.27_245	fumaric acid	62500	59697	53148	74131	47059	48041	60481	52356	63022	55012	118391	67371	46424	76152	100508	126274	103385	57700	79373	104794	143688	82587	60182	87673	108275	71460	70052	71300	68966	70034	61935	69395	86413	82660
13.33_147		43000	41210	52585	54482	45479	46862	43946	55519	66804	46663	79900	60288	69369	65018	74166	61628	62649	55827	59931	56779	53679	57005	50625	54696	48024	42832	43403	51488	49615	48233	44544	51381	62672	66965
13.42_204	serine (3tms)	1378540	937717	940096	1244837	1076052	841600	587354	687478	1737846	914522	452694	414714	1356407	851873	516545	1519475	419840	904775	642638	598776	420586	527932	577032	694318	750099	989412	1011182	1215033	1144683	874269	678958	788710	929296	919787
13.45_156	pipecolinic acid	78307	31242	263152	64937	46561	196762	48631	328299	88180	90680	43838	14137	271713	36491	32624	11514	10152	98339	7128	10901	10065	9753	54424	9185	11583	186216	85431	284424	97089	174741	90487	96812	114962	107573
13.47_278		27132	39531	50526	45989	35988	28021	44964	58886	36458	25480	31040	39232	53920	42205	24309	50526	54329	67793	64701	57585	62923	57082	45817	63751	53975	31338	35846	55866	51763	29647	46696	47813	55022	59586
13.51_215	nonanoic acid	13967	9967	9657	9821	9069	8792	8822	9255	12110	8385	8179	7187	8154	6952	8646	13560	11780	7332	8958	7862	9497	9051	9070	6824	5985	11584	8353	8088	8049	6657	8027	8211	8533	10472
13.96_218	threonine	918533	733573	601724	784989	734776	636288	643775	607957	1615864	574175	481089	680139	695262	529492	520977	725082	468275	352507	337237	569649	344251	566520	284353	401812	567014	661635	768300	810975	856146	547252	564951	603622	732814	704838
14.15_294		5498	5222	5697	6019	4775	8183	8919	8763	7133	7186	6405	7673	9272	8474	5946	6243	7911	8264	7889	5568	6170	6818	7158	5855	6012	6809	5957	6522	6725	4873	5481	5968	6909	6190
14.33_259	methyfumaric acid	25939	32094	44109	46000	30168	30643	34924	42314	41882	28322	43881	44237	48723	48843	34144	34867	46167	52809	55137	27882	34833	45019	51346	51985	28468	26800	32274	42568	45537	28645	27149	49582	50258	55355
14.53_103	2,4-dihydroxybutyric acid	15288	13802	13659	17850	16624	18064	20054	20026	31140	16899	34643	22575	18107	33036	37353	30315	29055	15973	27557	24313	26397	25379	18363	28344	21450	17752	19188	19907	20852	17833	22195	23092	27471	25673
14.7_218	S-methyl-L-cysteine	10709	8116	7974	13928	6697	4763	5794	7719	20656	4168	10152	6249	5559	7174	14101	10595	7220	5698	6737	7649	4269	5685	3838	5032	5706	7563	8238	9065	17565	5976	5107	6259	9336	8956
14.83_248	beta-alanine	40799	60675	52534	84570	20561	56666	71551	51426	69856	32142	130406	118453	68114	111470	88245	114352	74213	83209	132232	65335	49642	69802	36525	94519	61000	45334	51469	51752	72069	28784	39550	62703	86532	83311
14.98_233	3,4-dihydroxybutyric acid	6806	4619	4370	7844	7118	11285	6504	4793	14710	8065	31776	5085	3500	11216	24053	20133	14475	3326	11981	10831	8769	4612	3163	7853	7029	5840	5511	4734	8277	6510	8525	9425	10165	10170
15.36_350		215695	267517	305256	289614	223553	156486	188696	260748	273354	150288	234312	209289	249101	161418	280169	404622	284401	277399	326975	340745	349447	335488	205697	319212	327197	199982	241835	347992	289966	203996	204364	226237	262360	247557
15.7_235		126593	146153	270474	244817	94571	128828	181678	293003	246258	109690	183629	234110	360341	312031	117659	300516	253560	362638	378533	191435	225603	292024	221096	300719	156695	109093	162582	275495	246569	82688	108748	179114	232214	328666
15.71_320	aminomalonic acid	431833	164304	442562	487171	365168	113802	103269	186486	217442	133098	136373	91372	127789	132067	81269	181708	98634	178370	149927	157849	116806	132796	117919	164748	118078	182360	258045	428168	316617	184149	165032	219062	216166	240471
15.81_336		19994	24771	28726	40131	26543	41211	37580	43882	36909	33120	16134	33980	53799	53744	11849	21881	32304	53808	45705	21739	27186	30823	57573	46929	19877	23943	24032	28343	40845	26896	28674	33573	33223	41008
15.83_217		6644	6219	7490	5902	5463	6118	7539	6550	6952	6105	6477	7959	7574	6857	6684	7394	7022	7752	7434	6621	6887	7612	7482	7247	5768	6860	5776	6618	7268	5119	5563	6109	7041	6928
15.94_103		14640	14781	12044	9542	10757	12161	11774	14146	13533	11902	6183	6453	8000	8161	6317	4954	4827	4819	5004	4496	4841	4997	6703	4791	4314	9369	14393	8482	11577	10226	5455	7777	7996	7701
16.13_233	malic acid	64629	64092	57093	90693	53455	60665	88897	69037	74504	76603	53971	69892	60724	103130	63135	57211	75157	51516	61469	56158	62279	70131	55383	63136	62153	92150	76177	80616	84263	89563	72213	76684	91832	85376
16.33_174		56922	54850	57508	62895	47609	55832	53880	59432	62619	48957	61847	60174	61194	66229	53403	59289	63295	61625	63043	59387	56746	60560	62353	63383	54506	56477	57110	58876	61040	50974	50662	55229	61798	60102
16.36_217	erythritol	11819	9427	8218	11028	10660	7859	7488	7644	27479	7082	33370	17777	18635	39626	48022	27352	29688	10747	10177	18119	11246	13361	8475	9894	8882	21328	26777	18675	24973	34106	19292	20641	25313	23051
16.51_111	adipic acid	1417	3272	1546	3518	1546	1393	1163	1546	3013	1716	5132	2704	1829	2691	3892	3649	3095	1630	2317	2184	3571	2163	2884	2024	2717	1918	2034	1700	2163	1934	2154	2897	2237	3711
16.52_217	threitol	55820	54409	55900	71416	61473	61572	70047	62743	190353	53229	146642	112731	77397	142050	171724	127879	171574	78041	82685	88422	69009	109763	59345	71496	57114	81182	96993	91670	86267	93967	95853	99896	119769	112058
16.6_237		138995	164707	174071	171498	96599	119924	145330	175459	186712	108524	158692	173271	162981	181367	126027	141333	172428	175602	206913	116581	170204	162401	207743	216584	130523	146192	186460	141548	170668	94163	106966	155339	197933	211125
16.72_176	methionine (2tms)	69695	20347	43630	88443	28973	18386	8521	18089	107765	13671	50569	27636	12817	38803	68164	66540	31995	19518	32549	46237	29576	52787	15502	33512	74718	36018	24087	36166	52514	17825	16819	24982	415891	43604
16.72_128		25650	7510	16704	29810	12427	NA	NA	NA	37873	6480	20020	9659	6022	13481	27757	24463	12063	8082	13438	17393	9938	16995	NA	11552	25946	NA	12047	13743	20658	8587	6371	NA	17427	17520
16.77_232	aspartic acid (3tms)	58486	30662	27804	86406	33501	18626	15154	24339	61331	15251	54497	30547	33044	49980	94060	259191	56796	32538	69448	62237	29947	49138	33632	42093	43905	26466	61028	39923	44573	27848	23990	26173	43534	42375
16.79_156	pyroglutamic acid	1270534	1142436	1078991	2087448	1087516	788319	729715	821207	1272368	817727	1538956	1024255	1500147	1538530	2448870	4026326	1318272	1177534	1846947	2650350	1392880	1177059	874802	1409258	2148215	1059503	1413192	1492064	1386002	1147985	1276542	1348500	1563936	1555511
16.85_230	4-hydroxyproline	1254720	719495	888046	889569	1030092	494323	337747	419767	351191	390777	695274	318916	253241	328805	530488	323767	269841	168969	253458	243376	207797	199222	193902	219609	197593	799340	635390	607543	600147	627670	345294	431829	482976	466284
16.92_174	gama-aminobutyric acid	13286	14843	12752	15950	9047	13603	17334	14454	12770	12200	31315	40211	18295	21315	30549	21942	25163	16326	15165	16725	19595	40325	13002	15600	12492	14928	15959	18162	16466	10702	13627	15503	19475	19514
16.97_240	cytosine(2tms)	2136	2643	5216	4697	6241	64972	7762	4692	3951	6497	24951	17353	20136	15469	39051	10340	10429	9643	9972	6333	1634	3642	1084	1070	6345	5136	5213	5564	8413	5973	8856	7946	8132	9215
17.01_314		52699	47726	56115	31268	31106	44397	35191	55911	91635	52324	245707	124068	47091	59184	368214	193192	121327	52322	91897	150847	81139	86071	56562	101655	73158	32460	28655	34591	38291	29420	48808	59840	69378	73589
17.03_117		9608	8373	8490	11420	12908	42243	46950	31421	39262	44104	237755	176077	64343	59434	322715	56556	113200	53441	48968	33783	14887	20693	20907	20040	11130	8191	7802	17691	9185	10620	37601	42359	47624	45356
17.16_331		3048	4248	5159	6781	3946	7342	6594	7395	6667	5471	2843	4954	6784	8487	2713	3374	5866	7591	6693	3210	3756	4950	7623	6773	3076	4332	4408	6311	7451	4713	3933	5484	6185	6185
17.21_292	erythronic acid	34664	34644	32674	30100	33430	24647	29159	26724	43984	28436	147112	80869	37982	47194	210507	113266	119669	47860	48790	75093	50715	65444	32971	49843	38674	36130	35779	40003	34187	38405	51722	56662	62517	56519
17.27_265		12529	14420	22455	19293	14886	11964	18022	32203	20994	13288	13318	20673	26303	24327	10831	23408	22078	30110	26754	21472	19801	23807	17377	21678	16590	14040	17908	21936	20032	12216	13292	18325	21992	22836
17.34_115	creatinine	1328910	1506638	1295160	1313655	1181594	754127	738824	782102	1089153	853300	2531036	1541498	583093	1238057	2893875	1696994	1756780	1180404	1331968	1354677	1139927	1545810	1328602	603453	1198202	999630	1255276	786320	1114402	923881	1371941	1482352	1616188	1685005
17.45_120		77862	82407	81281	53100	57470	101251	194116	106978	99923	102712	24582	276409	313115	148116	91326	77144	107482	381001	351904	66473	20380	125715	191655	196265	162754	52730	105618	90415	72703	76694	184935	213399	126002	112806
17.55_292	threonic acid	25576	28708	19622	18816	24603	42905	35495	32749	45359	43942	40440	106479	40937	73785	46921	53639	72287	32239	33501	34836	21692	28278	20628	24309	13484	22519	29784	23445	21298	20108	32695	36006	39868	41138
17.74_229		9397	10002	9991	24989	8995	15075	12886	12800	22329	8937	6354	12478	12014	17390	7388	9938	14842	14843	17317	9801	10289	11251	14307	15292	7846	11705	19014	13251	21417	12197	9697	11212	12852	12461
17.84_129	2-hydroxyglutaric acid	50912	60228	48116	47971	45342	70239	65713	50281	60144	83862	88220	73495	49259	48688	68624	59456	61868	47417	87154	59249	52052	48210	43524	83494	53918	53219	49962	51648	68024	67355	58384	64801	58490	56259
17.88_198	2-ketoglutaric acid	61436	84578	62701	96758	55845	42182	65029	62043	61965	58660	59552	63126	112956	120127	65442	85800	102152	74790	135993	86524	54636	63299	70866	97465	48980	81360	77580	89878	74929	68289	75411	79053	95867	92806
17.95_142	proline [+CO2]	71748	57936	115449	161087	70555	41769	55336	90659	277670	42306	53596	43240	79000	103823	37334	87888	45454	68518	74884	50905	57176	66928	47756	68451	53299	73897	106499	179493	128107	59375	65542	87858	107456	123773
18.2_188	hypotaurine	80288	83705	67252	43838	41034	46018	49468	48707	74727	29862	44071	39564	27291	51220	26172	19613	24758	18946	29832	12536	10718	21190	14174	21098	11634	64527	87655	60525	72463	52622	25417	39277	52241	56074
18.21_103		3416	6030	4801	4515	5006	3246	5268	5183	6542	4782	11782	13271	8302	6861	13022	10980	11284	9542	8225	5489	4285	7288	6930	5829	7981	3192	5030	6908	4422	2748	8385	6126	6178	8362
18.27_279		16251	15800	27699	26079	14796	15604	23455	32544	26640	14857	18931	23962	37396	32160	12840	33551	27209	35664	35609	24966	25743	30326	20373	28196	20871	15098	18777	31712	24558	14501	15402	22428	28307	30714
18.59_246	glutamic acid	696001	757853	422548	1297075	436608	196127	220991	260594	760486	244025	308907	328054	793435	874654	831737	504581	616321	672521	1325522	627388	183270	349375	435340	670127	302971	341561	678266	498785	702374	491772	366757	457368	548127	550657
18.66_218	phenylalanine	264671	352545	343901	443929	214651	256754	271881	320975	996837	255853	916762	1605621	1335562	769737	1234553	928489	722526	1126964	1714780	611985	486363	837943	477036	707422	625182	202686	364830	430632	336809	199723	349019	470343	595719	571706
18.68_174	5-aminovaleric acid	14040	8811	10726	15586	9677	5718	6960	7211	10816	3530	21596	17292	13418	13168	11358	16075	18470	10424	16659	8271	13053	47853	8286	16314	7071	10188	12866	13747	8121	10751	9980	13140	14354	13290
18.8_174		53590	59773	61487	60445	49167	55153	55194	61651	64785	52708	56041	56132	58454	59374	48811	55978	63083	57506	60448	55846	60312	60722	62562	66535	57107	57428	57328	59924	60587	46135	46988	53894	59592	61597
19.03_217		52608	40784	48523	54921	57978	40187	53696	51494	43806	53238	30238	31383	51282	74647	30356	39353	36873	47976	49851	47504	54703	25884	49671	59272	67657	49637	66969	47332	50707	54921	74187	73412	68673	68985
19.14_103	ribose	16153	15865	17072	15720	14350	11907	12458	13904	87210	10760	26292	24583	30168	87344	26979	26658	27539	22278	17792	20295	15725	22099	17548	18000	16436	19466	31796	27443	27198	30694	29401	32342	35102	36278
19.2_117	lauric acid	15726	12241	8224	17590	11290	7609	10739	9705	9919	10384	11773	7424	10271	11333	19988	17540	18702	6254	11847	9684	7385	9678	11640	6101	6462	4219	5136	5641	5669	6116	9191	9834	13377	11974
19.26_451	pyrophosphate	5008	18722	2321	2666	6666	4508	4688	2193	4315	6120	4654	2983	1503	2076	11177	4591	11054	9548	1881	5090	2855	2618	3547	2234	3737	14515	11199	1986	5842	6912	9270	3686	4697	5983
19.25_103	lyxose	29492	13455	15632	49934	30057	11616	18073	13256	35979	13949	66718	27357	25229	23675	73422	29484	19287	24653	30293	20628	17235	19230	24638	26023	18107	36411	63115	40865	32186	19482	23330	25002	31570	24327
19.32_245		6420	5648	5569	7155	5912	7848	7364	7568	13171	6938	33806	16827	7354	11401	51673	18635	25210	8435	10566	10891	8458	8975	7451	7934	7191	6083	6278	7553	6709	6108	10339	12137	13414	13207
19.42_217		46223	33240	37740	45188	46374	35763	46000	39180	36188	41327	26419	25065	39804	54898	26390	34666	29378	37514	44635	40881	42910	23641	36805	44537	54259	44364	56406	40258	43352	48242	57985	59385	58220	53229
19.46_205		28707	27081	18768	25241	21194	19607	21832	18223	23165	22841	38970	34733	25786	40632	40514	26337	36811	29443	33923	21660	23306	28407	28330	23986	27514	30324	37071	28412	24983	29691	28188	30126	31894	33567
19.47_103	lyxosylamine	75449	31572	21570	39018	20605	17050	23792	22054	38875	20731	78882	60162	24923	42923	80362	30844	42854	35607	48886	21927	32549	26451	29442	25914	32864	63289	83411	29872	27577	21439	32595	38105	42439	44269
19.48_320		5692	4517	5232	7449	3854	2654	4914	8821	10495	4567	2547	3087	9966	5864	2358	8063	2358	7158	4720	3887	2556	4930	3478	4611	3683	4772	5853	7583	5391	3364	4317	4910	6347	6503
19.58_129	3-hydroxyadipic acid	5652	6621	5511	5925	5014	8804	5885	6890	7724	6012	19504	14526	7818	8305	32992	20362	17496	6070	13911	29917	10763	5144	4600	12690	14898	5620	6057	5579	6190	6407	8205	11494	12242	11981
19.58_103		10642	9222	9334	12305	9277	7928	10405	8799	11870	8980	13222	9345	10888	14857	17087	14456	14515	8868	12006	14770	10862	9949	8750	11849	11989	10229	13312	9613	10492	10298	11178	12463	13470	13117
19.64_417		10362	12699	13582	14469	6197	6315	6084	5455	9658	7440	38088	17933	5875	13237	46351	21455	19573	12063	11700	15852	10826	17706	10279	6456	11888	6965	12155	7344	9944	5950	8398	13057	15548	14888
19.66_306	xylulose	7958	6501	6645	8504	6300	6170	8478	6855	5918	6301	4828	4461	7142	10176	3651	5687	5188	6586	7559	6659	8643	4568	6611	8405	9118	8166	12629	6670	7952	6649	6763	9213	9847	8874
19.78_282		34987	38886	58723	48649	36733	25751	38986	60745	44645	23625	31794	31408	57500	32275	34013	73565	48659	57626	59944	59401	69061	61556	33127	55276	57285	32261	36481	63856	50281	36408	46159	48528	61274	57841
19.87_217	xylitol	39111	42080	47231	41181	36055	32275	44129	39800	40646	28474	43237	48765	36583	56094	40717	39398	48023	35090	42343	41854	39328	48679	25527	34388	37181	43361	46571	47778	54951	44164	43386	48399	57616	54451
19.92_233	oxaloacetic acid	4221	6905	4649	10260	4532	4807	6948	3870	5029	9778	5883	5991	4714	5572	8921	4347	4931	6106	5639	4911	7979	5872	3431	4133	13017	4906	10127	2946	8062	5673	6012	8501	6951	8719
19.95_277	5-hydroxyindole	64439	22363	49898	51351	54116	72175	31445	36723	102195	62874	74854	49052	34314	36836	123098	74301	85184	39103	18202	45368	40723	90349	25433	30567	33230	50869	26206	72319	39489	61126	44031	49258	60004	60628
20.01_407		2337	2374	2394	2559	1593	1450	3389	5911	8252	2002	1306	2261	3453	2281	1018	3152	1785	2077	1668	2624	1627	2746	1140	1671	2208	3106	2601	3059	2859	1208	1629	2611	2874	2779
20.07_217	arabitol	52686	42465	41119	55894	43069	39589	50482	45297	124907	37344	81090	54729	49557	72287	97261	67609	60734	41600	50410	51796	48021	41883	40408	49441	40695	60155	76223	62586	57946	56811	54680	58195	69706	63567
20.12_117	fucose	23139	24093	42433	35305	24182	15311	17743	32191	24466	18218	28591	26915	50282	32064	33503	27579	28361	31304	37115	25309	24858	30432	29699	43131	29948	20529	31026	70231	53657	43725	28039	32744	37890	54327
20.14_217	ribitol	6893	7964	7275	5973	6721	5065	6587	6121	5707	5462	7842	9445	9490	12094	7857	8903	9137	9512	10456	8667	9279	9690	8720	8801	8754	8327	10358	9391	9169	5902	7276	10118	10347	10942
20.19_243	gycerol-2-phosphate	8607	9983	8673	8781	7264	9019	9292	7331	10588	7218	6572	8290	7524	8311	6414	6131	6406	6822	7387	5397	6581	6830	5498	8814	7389	8311	10600	9394	11353	9339	6983	5816	8026	8673
20.23_273		38002	50388	41323	66175	39754	51624	49855	33351	43074	25595	14558	17514	23692	33965	18826	19162	25556	35110	35722	21834	33567	23512	41020	44038	28795	39581	51642	48730	68852	61674	48671	35157	44029	34415
20.28_174	putrescine	37744	45062	36835	39292	27361	29097	50137	34141	34501	36468	47953	52876	31903	37890	35015	76047	55020	37370	39707	45843	31200	69073	26024	19834	28146	27049	36352	28519	34862	26154	33896	39132	43095	42383
20.3_296		6710	11909	6299	8419	5904	6411	8964	7685	14850	9674	35614	26026	7535	13351	54097	37912	44360	7874	14085	27315	30416	31973	15900	12008	23060	4201	10830	4958	8250	3854	11736	13178	18718	18330
20.32_130		14299	16172	19328	22270	12412	13838	15823	15997	22436	15819	33914	21250	14143	25929	34785	25044	16437	17975	24904	18946	16844	26643	19832	11869	18479	13392	14691	16095	16524	9798	11873	17390	20972	21823
20.39_217		13010	10378	8922	21482	12917	8624	8175	10047	33861	10598	50579	35309	12538	17493	55961	10919	13335	9980	9655	9706	5505	7396	6638	7864	7179	13613	17392	19321	20506	16474	11744	14338	13221	15333
20.48_333		2792	2773	2354	2803	2638	1915	3459	3001	8751	2205	2135	1559	2936	3772	1815	3229	2467	2216	2993	2255	2746	1362	2854	3096	3408	5092	4638	2940	2778	3274	2807	3502	3661	4092
20.52_174	ornithine (3tms)	98663	64131	58966	109989	78411	40795	34343	48290	184597	44226	53121	115700	113663	80113	199626	56526	65206	76015	42984	39233	27288	28707	45704	39600	27287	54912	120925	104305	85621	72789	58347	50995	100647	81494
20.54_229	aconitic acid	389497	387340	416107	452130	432589	568678	553606	612778	520348	504424	563179	726512	553684	634178	669982	444689	527263	518497	537903	365501	452776	414177	517717	466461	289676	644247	462045	380275	446578	427510	483730	515452	503015	523380
20.66_292		5936	6451	5436	6670	5258	5715	6292	5498	13160	5522	21455	12044	8913	10495	28221	13919	11479	7781	6572	11077	8119	10012	7436	7602	7096	7864	9609	7707	7776	8066	8498	9585	10077	10381
20.67_273		18296	24363	22036	36533	20048	26980	26756	19103	27167	15561	8408	11918	17876	22956	9840	12385	16387	24863	26121	14372	19639	15697	28638	27491	16271	21917	24368	28070	35487	28062	25891	20700	26961	23864
20.71_357	glycerol-3-phosphate	127186	186055	121111	116978	90488	45972	58709	59218	88479	39851	59136	40164	47034	55646	67396	49029	49047	51686	79081	42806	58279	58702	54343	71414	56046	100461	165231	109826	107173	95358	53792	63438	68134	67931
20.78_217		35332	70142	27785	28233	58988	56974	95470	40567	69731	41656	47458	56473	20829	37585	68319	76754	75235	33780	71857	78155	60300	92641	36713	86877	77298	31468	58511	22618	32189	65982	50003	52899	58542	59442
20.9_292	ribonic acid	19497	11008	13325	12882	15550	11740	16166	8916	27092	13839	35777	16892	9662	13431	41393	21109	16385	14588	11539	12503	15249	12580	13020	14057	8348	18363	18155	12620	10941	14065	12369	18345	22787	15750
20.91_274		29027	22743	37053	33948	27766	14869	NA	33798	21570	9711	26158	15540	17692	17788	18300	21181	15610	11758	14594	13031	11259	13450	9094	10211	11930	28685	23840	32379	23635	14641	14491	25571	26640	30706
20.94_299	phosphoethanolamine	23176	22710	23093	31411	13994	16485	18278	17492	38715	15559	14612	11269	10973	21239	14081	15403	11556	14810	19312	6717	15001	16932	20004	18408	10798	21789	22519	20185	24976	15641	13052	19866	20028	25279
21.66_287	methylcitric acid	41242	36506	40370	47187	40263	60030	68232	64909	64917	46506	40653	49766	50297	56862	46343	44387	54231	41904	45724	43290	46091	45656	47392	44834	34584	54042	46598	46259	51609	54429	49137	54673	56705	58618
21.71_287		36396	33845	38241	42085	38240	55239	64269	64268	60799	47368	38274	45795	42513	51160	39942	41241	48740	39722	40758	38370	41373	43212	45414	41205	28909	51413	42160	40808	46437	48736	43718	50117	53646	54667
21.72_157	dehydroascorbic acid	115913	88138	107976	147352	104531	94713	143753	123458	149049	96087	57416	61201	81675	113303	61241	97009	72230	87728	114315	110768	134723	64084	105931	169045	151633	121388	161262	133805	144293	143290	133874	145383	163306	144222
21.77_157		152564	135497	57073	86106	62860	46894	59479	49181	55171	53607	13981	26656	50357	73609	22046	42850	29871	57308	63790	68170	68700	29897	55048	93997	169933	64394	96415	85909	83989	74230	74364	69557	80553	82054
21.81_217	1,5-anhydro-D-sorbitol	349182	456539	413583	389264	277343	374036	366053	366896	358952	320869	397579	358849	436328	359092	335941	461862	375902	428717	392691	329819	386383	356123	394308	407401	331172	354227	469065	469993	349553	351821	344248	378703	431716	426634
21.84_285	myristic acid	25915	77729	46369	16016	16365	38687	42753	35791	21352	24148	43300	47927	38711	29358	66073	43313	57350	35045	37286	43635	28450	39245	24938	37205	23016	20518	18340	17384	18225	14570	31702	36432	39235	41290
21.85_174	lysine (3tms)	382166	332561	393227	569666	307721	279139	281162	343035	787636	258438	532993	738074	384813	443448	880048	363395	385765	275488	272334	234937	229253	367110	243401	255306	303333	201095	221648	104049	319850	82270	294914	356164	425717	393844
21.88_245		32548	28198	30306	33736	29449	41949	48737	47383	60599	34803	30299	39278	34138	47173	35130	31509	38184	30469	32890	30475	31547	32718	32269	31950	24552	36924	35442	31332	37875	39900	35223	38013	44771	41058
21.95_205		63495	67426	69827	70801	54609	52488	67889	70924	66274	57180	43172	53284	73350	77810	43887	68377	68203	88563	92516	78968	79856	70165	64931	85702	79681	53985	68118	76672	57130	58106	54977	67335	79384	71515
21.98_103	fructose	58215	72053	60962	81272	60549	71099	83812	51912	111090	126081	48833	54419	41791	89334	44678	52602	51821	73485	65490	61223	69856	52989	59406	79110	60105	67323	88535	60685	80224	69564	55884	80239	120200	75650
22.08_157		29944	22096	17839	40782	21683	13710	31936	19655	43561	12268	19055	18709	21261	14206	88084	174474	123462	140235	193831	199521	13379	127592	6111	23707	26145	27258	55647	41995	42457	41242	35391	34795	34078	29956
22.09_103		26170	34945	229240	38632	203114	25981	42344	264796	72902	67144	23010	23581	273496	335727	190027	392573	286602	15824	461275	449016	408364	293444	336431	530618	340402	37476	63857	40697	50256	40273	290557	301921	355927	350481
22.14_319	mannose	995189	1052792	1197890	917784	1152613	1603589	1217806	1411073	256943	1763530	1015117	814245	1493246	1785373	1114086	2335782	1571326	1868686	2422035	2762652	2287164	1719082	1861297	2902961	2100435	703598	468794	338160	785409	843389	1629565	1761025	1912692	1880567
22.25_179	tyrosine (2tms)	184122	142512	127753	163446	152283	134319	142113	143221	406164	118896	43458	51689	169151	97635	78461	165014	95843	149912	109902	166040	127280	141106	132509	177398	191864	195775	294723	406982	165711	337481	140950	161156	196482	169279
22.35_179	4-hydroxyphenyllactic acid	194981	162333	168810	214049	200336	143115	134894	151384	307186	144483	149533	120707	184440	164400	140162	201602	154555	158209	145171	169337	140855	167335	151335	180402	196643	164941	221355	267134	166956	227808	199921	205946	228539	218080
22.48_319	glucose 2	8422164	7099955	7996561	10126844	8095604	6419586	8263833	8246726	9177789	7090583	5627264	5269955	7531326	9681920	5625442	7599752	6079205	7065918	8608213	8060874	8943670	5190636	7413607	10514435	11165344	7599144	9452394	9243368	9131929	8756945	8533905	9420119	10259933	10124247
22.56_273		78220	64925	81070	86800	76339	116075	125131	131569	131850	96146	68772	91005	87954	104642	74955	83842	97114	75490	85356	70190	87861	87243	85249	76109	58456	97342	85440	86302	86833	96331	81373	97311	99345	104101
22.58_169		13229	20119	14298	27004	11563	4404	6753	4672	14869	3677	2657	2989	3213	5053	4621	5725	7285	7016	9133	9079	11515	8636	12164	22123	12880	10155	21028	20934	28428	19233	8305	8383	11692	10290
22.61_319	sorbitol	49236	43102	49424	68732	47099	45702	69910	57917	84501	51905	61481	46528	52280	88531	52546	66972	57101	48622	66040	69545	60802	44026	54648	73972	70147	71262	193322	65247	67306	90874	69505	71715	86253	77483
22.63_273		61947	53703	69649	76972	65250	98532	115335	114034	107840	84054	53240	85878	80581	91803	65024	73075	83973	71444	75850	64379	74988	74387	71030	74330	48706	77433	76819	74737	79939	87932	71328	79708	99161	93067
22.67_333	glucuronic acid	52297	38382	40584	52126	46853	27000	28928	35244	51153	29276	326743	257934	73084	37680	449479	85815	97621	39200	40801	51288	36109	39645	23364	36680	35157	51573	57325	60100	45405	53966	44938	49726	59560	54857
22.83_333	galacturonic acid	11227	7881	9055	11483	10075	7834	7000	9146	11145	7815	55169	44075	13488	8984	76750	16379	17461	9059	9479	10091	8151	8471	6891	9316	7991	11167	11156	11619	10361	11435	9291	10116	11884	11828
22.88_305	myo-inositol 1	13670	7825	9729	37359	17766	8348	10773	10196	14263	9483	53284	22975	34349	68293	37687	93193	94240	38663	17449	16959	10200	25226	9298	9187	5898	27447	57604	59027	35263	57557	41744	43262	47945	46792
22.9_299	pentadecanoic acid	8233	12720	9529	9196	8915	9622	12294	12194	11422	9524	12126	10910	10186	9009	15443	21572	11624	8953	11872	10602	9636	10257	10427	9909	7881	9882	7864	9532	9611	9470	13420	12861	13271	14764
22.91_217		143582	107859	95143	188882	85148	97023	132349	116788	164264	83982	55075	71162	95963	123342	97353	110991	83457	94644	131662	152143	128451	74637	101748	174842	213478	125043	182580	137072	177252	122810	81098	97928	123593	112421
22.96_292	gluconic acid	28329	33363	37506	26807	18351	17922	23266	31436	28254	14657	180910	156004	59085	21751	168288	37574	57773	54918	19649	26684	34962	44459	33672	22357	29226	28095	38389	35370	27119	19834	30697	32830	37729	36648
23.04_373		2881	2799	3659	3358	2972	1900	2019	2566	3577	2650	8734	5376	2640	3975	11920	9232	6854	4368	4662	6593	3484	5311	3100	2380	4107	2298	2639	3161	3102	1645	3206	3766	3842	4587
23.15_204		699830	93424	230974	741922	330928	160531	3146129	3718456	2332245	644492	29020	197341	561361	852786	113117	241259	140556	658795	387617	84464	115468	302916	321910	205948	584961	1296378	1521448	515236	494229	294195	588203	505573	389254	543866
23.27_217		42634	36076	46975	60252	32815	35442	43917	41747	96553	33130	29563	31725	44534	58841	28435	40585	34732	39823	48664	41960	45509	27605	39109	60432	55470	36968	59814	54724	55698	38555	34310	46608	56478	55044
23.3_291	pantothenic acid	9068	7925	7014	7792	7136	6555	7710	7831	14109	6100	7297	6782	8297	8805	7185	7854	6200	6778	6296	4888	4627	6571	4731	5812	5446	9620	11327	9353	8154	9535	7080	7840	8687	8476
23.34_292	galactonic acid	14982	14337	22564	10477	10456	10419	16207	20661	8660	9583	19384	11148	17049	5088	13736	13675	7391	14388	7907	6595	11506	8758	7666	9658	5679	10421	13366	24615	11688	13068	11520	12241	14023	12485
23.43_293		23824	34834	40059	32833	39075	31426	6325	7320	11873	44572	6192	4744	6289	7285	5939	5574	8387	6682	8685	7428	6923	7017	6845	7221	6281	61791	28273	28814	17535	20932	6052	6645	6274	6441
23.45_333		11439	9760	9909	9143	8853	6947	11431	6469	21902	7652	5976	8942	7812	10487	8941	10278	9652	5637	4614	7942	6848	6396	3746	5793	6344	13173	14224	13507	10069	10484	8502	8521	10112	10317
23.49_273		40463	36015	43978	49130	43090	69455	77865	76956	72514	54922	38750	54120	50564	61148	38473	44184	52274	44321	52020	39986	46836	47267	53267	51045	33119	56726	47508	49740	51678	53940	55989	52359	59682	57616
23.54_449		36121	33330	11977	36846	11273	14334	33402	38230	79158	12027	84094	93139	16079	55047	95223	48223	78495	21373	83400	18522	38735	14889	27843	27378	11580	86721	84216	13711	25779	15940	15906	25527	37351	44988
23.63_311	palmitelaidic acid	2576	8548	3878	2595	2397	2003	3241	2779	2802	1898	1215	3247	3637	4044	5478	9531	6374	3730	4263	5451	3156	4528	3139	3015	3004	2009	3374	2514	3151	1985	3184	4098	3667	3848
23.66_204		531352	442347	589200	864172	431789	438900	633122	681188	789990	440823	414584	419818	818250	1041216	388701	557837	436704	622490	802689	541515	647175	370103	607176	908917	825379	455463	735550	741227	788036	498783	516422	648214	837669	962994
23.69_311	palmitoleic acid	19749	84462	45188	6428	8612	41182	19341	24429	6697	18189	59646	43574	32484	24065	96619	35135	57342	35668	34412	51366	34719	36053	22566	38441	25447	9475	7919	6596	5746	4055	27881	28375	32309	33054
23.86_219		13138	11846	21847	15108	13334	13300	4096	4405	4115	12217	4943	4484	4121	4015	4078	4862	3808	5354	4472	4032	3819	3568	4345	4752	3969	15652	11512	17977	11457	11860	5370	4714	4695	4579
23.9_313	palmitic acid	873623	2200437	1414230	698524	733129	1147466	1390077	1209081	803047	912456	1345643	1291663	1221405	934077	2052655	1165835	1757179	1349116	1304717	1293069	1034931	1324448	1077014	1410106	890528	685013	824076	777521	838445	613309	1208094	1202673	1306126	1454930
24_273		34881	20478	18549	40880	21421	57594	72392	40809	55788	36915	25894	55758	37071	44382	34683	25286	25783	26213	23657	22549	25742	33329	34295	38092	22886	37670	48642	35575	41903	41751	21634	35815	49209	34667
24.02_495		16897	11843	7563	22320	17268	20957	24528	13078	34599	17230	11883	16614	9980	26953	18665	6302	8447	7563	7768	7666	9050	7900	10282	9282	7634	25884	20537	10099	20417	40584	16044	17906	20228	18402
24.15_205	N-acetylgalactosamine	5775	4625	10330	10476	7456	5719	6745	7788	7615	5870	9921	8686	7946	8795	10423	11978	9917	7627	8527	12546	9835	10132	7858	12288	13025	6954	7448	6372	4610	4691	11218	6927	8571	13374
24.16_273		64093	61624	81513	78990	84703	108720	154254	129505	123952	84419	55968	79038	76146	129813	75765	91518	134333	90166	93193	80689	96425	90873	80671	101120	56442	124389	84256	79040	100963	104238	91216	104971	122787	106941
24.25_217	myo-inositol	1136989	1146264	950252	1217510	859351	552622	752563	755056	1449083	643080	1344907	973230	592150	797498	2644732	671822	1523220	670461	613064	487978	793351	608794	691010	341935	670889	952082	1409675	1283618	959345	1050040	928890	1022329	1066783	1069389
24.31_333	indole-3-propionic acid	4956	1919	2047	10212	3941	1940	1952	2260	4463	1697	2648	1019	2832	4129	2674	3641	2694	1416	2641	1125	1368	1012	1116	1659	716	6329	4909	17121	21175	8493	4458	5334	5581	5771
24.54_83		21076	27326	22957	27494	18140	5433	9643	9033	15553	7191	5911	5620	3367	4782	5638	7685	8373	7006	13283	10476	15045	8141	15779	33049	14502	13663	21112	16333	29377	23663	11722	11720	14702	13769
24.64_325	cis-10-Heptadecenoic acid	3124	10341	5467	6123	2548	4317	2675	3313	1726	3003	4796	4764	4136	2744	11265	4744	6105	3691	3537	5766	3466	3902	2357	3788	2764	1697	1943	1637	1918	1570	3765	3219	3476	3830
24.64_319		9132	7812	9026	10745	6455	6228	8530	7091	8576	7745	9439	9212	8403	10009	12112	9908	9709	8881	10339	10637	8495	7551	7607	10100	11226	10218	11676	9283	10278	9566	9118	10494	12630	11526
24.7_319		11303	9294	10935	14477	10040	8282	9499	10205	10828	9020	11946	11973	9942	11473	14658	11864	11775	9554	12235	11428	10214	10100	9888	10452	11178	10955	13720	11095	12491	9495	10993	11868	12408	12401
24.86_327	margaric acid	18302	41511	26912	13343	22759	26671	23954	26374	19159	27651	27033	22238	23640	17202	46664	23177	26751	18912	19152	22283	15531	18369	15688	17265	15447	20906	16368	17887	20136	23198	32820	26532	22655	31605
24.95_327	1-octadecanol	12654	14138	15049	13228	11756	11884	13119	12283	11928	12684	17583	15888	12194	13171	17674	20233	20944	13003	16743	13086	15384	19735	14883	14904	13392	12708	12339	11939	12366	10675	13256	13448	15019	16933
25.09_202	indole-3-lactic acid	38143	22622	17660	54836	40154	34008	25637	17899	47403	36215	81164	44110	18121	59958	104098	99824	52429	17031	46813	71449	56372	25517	12328	40650	63052	43068	43198	86363	31857	54396	41108	47928	51824	51796
25.39_342		87523	98470	69889	77385	71807	21381	41795	28430	74122	14844	22131	15674	8049	9880	37269	24699	24617	14290	13816	28139	39232	24105	24170	41641	40552	79306	112372	79602	108161	107194	43615	47755	51862	51134
25.43_337	linoleic acid	127264	494135	263829	95452	93957	183256	175286	228607	141462	132190	245234	258578	218255	126131	444836	190946	426991	232671	182872	229440	155687	281197	184517	208155	127687	92687	120740	127824	89857	69110	183654	189219	206465	220611
25.45_314		689558	866791	747015	1238514	726357	732581	1388488	722343	851896	702232	777097	811711	768908	1132882	659755	665727	777983	714971	1217052	666169	922921	927399	923756	985440	676552	823312	740139	936255	927779	815923	689443	772519	824249	821957
25.45_202	tryptophan	336119	206004	231055	427251	311053	286893	204067	240353	1057471	382140	195323	295774	336432	609507	356756	688305	189569	247070	498424	584513	276606	135586	4963	314558	413273	230503	336625	373997	367127	245437	201922	271976	341840	344057
25.48_339	oleic acid	269427	1119207	629205	146984	176377	470011	346263	465528	183855	328009	515954	501231	567075	363727	828261	446236	870459	630909	596452	602658	431423	628571	478503	701144	343322	169780	176853	159789	149794	106946	434926	451267	488748	518374
25.54_339	trans-oleic acid	43138	105846	66617	27060	36053	69140	52302	49737	28647	47072	106028	70225	54886	46346	148104	63157	92623	63675	65730	75420	56061	63384	54974	67687	47465	35193	32651	30825	27436	27844	64349	64201	69184	71437
25.67_273		20591	15228	18842	20552	17680	28759	33027	32148	26822	24285	21560	23555	20392	34402	19104	20037	23809	20264	16522	18794	23587	21418	16525	20164	22396	22628	18998	20632	21044	27311	21187	22046	36070	25498
25.69_202		38148	43324	43283	41383	43933	39871	39839	39802	49701	48306	31384	35673	42385	53952	35548	48283	34476	41473	49003	42430	40720	31874	25170	42559	41473	36941	40672	39427	35110	35686	43989	44421	48668	50180
25.7_341	stearic acid	802076	1500618	1029313	605223	766184	993937	1047137	1002047	755947	995695	1369216	1141156	919160	795595	1760388	856282	1248874	969877	1141883	968346	829807	1031297	891868	1145803	772010	731227	825936	764280	748736	676130	1072635	1091210	1052619	1237390
25.74_273		17688	16596	22190	23907	21697	28249	35525	34967	34749	23433	17657	27246	22741	21557	17745	21658	27856	23204	22483	19222	26482	24914	25140	21309	17903	29776	24425	24747	25771	25358	22536	28388	29902	21501
26.03_204		9706	21580	10395	12665	6465	7088	9157	7563	10450	4748	6081	13222	5896	12011	5511	7063	9680	5682	6442	6525	5248	4648	5085	7546	5178	8154	17350	6568	6652	4931	9530	9494	10076	9947
26.18_387	glucose-6-phosphate	9940	6354	2874	5470	3668	2277	2376	2161	4560	2448	1775	545	1237	2744	1779	1505	NA	1287	3472	916	1254	966	1543	1767	1691	12509	10914	3480	3776	4516	2532	3021	3226	2563
26.42_204		4394	4063	4489	5294	4217	3887	5787	5217	30899	4581	6545	6032	NA	4549	5844	NA	4908	NA	NA	5106	4935	3652	3988	4123	5124	5954	7511	5735	6230	6909	5773	5583	5550	5237
26.6_91	arachidonic acid	27880	30813	21680	19636	20392	18668	20628	15821	21959	15790	26000	23734	9825	13060	35159	18616	19098	8987	15569	17905	12462	11093	10163	19382	13606	24533	29826	18942	25130	22144	14111	13804	14052	16682
26.64_246		4237	3456	2768	3604	2333	2082	2584	1680	2111	1845	5282	3283	2226	2292	4664	5255	5058	3281	3551	2950	3010	6861	3435	2847	2542	2062	2747	2465	2532	2809	2400	3212	3611	3913
26.73_129	cis-5,8,11-eicosatrienoic acid	7549	11246	6185	7630	4003	7790	36013	7649	9310	8484	9456	5558	7000	10733	10790	11089	9470	10236	6849	5549	6986	6551	5277	6522	6021	5927	8419	12263	7807	4614	6646	11441	8558	6667
26.79_318	myo-inositol-1-phosphate	76251	69202	66678	80071	59282	27911	39045	32673	71117	20041	24542	17667	13238	15041	28066	22518	26972	16257	16812	23300	30849	26760	25562	28564	32190	72898	73592	75528	89007	67836	36588	39684	37287	43241
26.85_217		37528	21908	589132	21619	555525	22562	30860	20416	930413	683852	741903	37777	28986	20500	NA	51699	45880	34806	55271	31486	746199	733198	33074	32882	24455	18386	558443	569753	54095	29030	78799	87989	93559	92395
26.86_365	cis-11,14-Eicosadienoic acid	5234	17380	9057	2972	3905	7808	7959	8387	3586	5606	14758	13430	7996	4806	17377	8022	16660	8010	7150	7740	5639	9107	5945	7204	4431	4656	5159	3925	3453	2933	6812	6700	7309	8156
26.88_367	11-eicosenoic acid	5597	19577	3162	2693	4086	9542	7238	10689	1013	7017	28316	15093	9433	11241	23200	13123	20851	13207	11600	13052	8590	14147	10469	13385	6715	4677	3514	2250	2661	3000	9415	8716	9602	10013
26.89_375		107594	94921	77204	208424	82526	71862	60020	83762	118229	77665	42095	36809	43140	64144	183497	33478	34891	27216	38136	38468	37825	48783	24461	44220	39761	89802	57861	62179	73350	99792	58877	66773	71903	70100
27.03_369	arachidic acid	5035	8279	6134	4276	4859	5815	7860	6335	4919	5550	11944	8622	5786	4892	14199	14406	9098	6699	8621	6441	6511	8811	8001	8614	5690	4599	5077	5310	4901	4349	7680	7220	7609	8052
27.07_285		9476	9516	7282	9340	7049	6180	6226	6647	7595	6718	18448	11582	6931	8856	23429	21835	15493	7789	11612	13732	14127	13281	9746	14093	12079	7618	7607	6666	7853	6605	7082	8395	10082	9679
27.17_314		18314	28017	18462	27084	15655	20788	26068	22031	24033	20247	18202	18102	19240	14472	17989	18334	20098	15984	23612	16181	18826	19475	19998	22922	15467	17093	21939	20168	27086	22054	15856	18705	21063	20079
27.23_117		11679	17061	13933	7457	7534	19106	12030	14041	9201	9963	23382	15347	12580	14696	23471	10308	10524	8730	11622	9850	7446	5939	7624	10592	6247	10519	8538	6975	6855	9262	9630	11047	10731	11497
27.32_217		14060	34462	22038	13853	17265	36439	12532	121178	21084	59310	16561	10686	10434	11505	11226	9777	10079	9487	10483	9235	15850	15832	10381	9816	8484	11802	18358	18174	13252	23744	31011	32433	36151	35681
27.58_117		7425	7860	7892	7013	6382	6664	6556	9181	7998	6624	7789	7366	6291	6529	12539	12946	6352	5684	6135	6034	6509	6666	7143	8156	6705	7239	7048	5861	7824	6441	7582	7205	7752	7437
27.58_512		108825	108010	116023	115303	108618	109585	109134	113166	113614	106954	108357	111173	118500	120227	110470	114439	113377	116620	118082	114144	109270	118470	122451	123337	110100	109783	112850	119359	118160	108675	102194	106710	114641	114858
27.72_230	inosine	71030	61423	44695	52414	33186	38808	57323	29172	24656	25890	49954	42104	45896	26471	41822	12681	9117	18410	12471	9392	11928	12723	8500	20228	8259	45393	58554	67249	70563	48550	22587	27299	30453	29494
27.76_371	1-palmitoylglycerol	16677	19801	13074	20168	14008	23665	15992	20215	31615	19472	19136	16691	18580	18993	36821	48100	54793	14391	20349	30900	24960	19584	19833	28146	18897	30477	20637	20311	30779	17498	26256	25607	27391	27308
27.87_85		12751	5885	7986	9438	4347	13535	11599	6528	6406	6092	8788	7588	5429	4676	6167	8904	5606	6795	7487	5156	5886	6757	6190	5220	4638	5113	7433	8627	8771	9874	4322	5773	6428	6424
27.94_361	sucrose	23770	27103	19137	36120	26228	32217	65826	22852	50288	31751	53946	35369	16764	30171	39935	33682	52698	69818	28118	35901	54428	41063	51629	47107	14479	27047	28869	43151	40512	33157	32542	61460	100106	42493
28_236	adenosine	5063	6488	6153	5087	3907	1579	2505	2374	2663	1881	862	1421	1124	799	964	NA	NA	NA	NA	NA	NA	NA	NA	NA	NA	810	1121	3641	3766	5249	1585	1223	1807	2121
28.05_129	docosanoic acid	6618	8457	5524	5965	5306	7021	8672	6213	8804	7384	34006	21207	6557	5583	37925	12974	10548	6217	7085	7307	5279	8627	6079	6414	4685	6276	8120	5756	6384	6741	5681	7632	7075	8376
28.17_222		7523	8108	10590	8444	9311	5271	6920	6677	7991	7449	8155	7712	7672	8639	8976	6659	6823	7007	7950	6848	7599	5934	8850	8362	7282	7086	8722	8116	7833	7004	8923	9628	16496	10774
28.18_204		11691	13545	13396	14720	12396	11045	13211	12875	15379	11873	24974	21316	14114	13730	37681	20611	23868	14801	16085	17362	16526	17405	13202	15748	17086	11898	14243	14775	15057	12624	13812	15576	16200	16683
28.35_85		11686	5095	6529	8684	3714	13508	11809	5278	5192	4752	9948	6024	4218	4420	4978	8880	3978	6031	5276	4655	4920	4839	4346	4304	3623	4499	6804	8117	8609	9107	3680	5165	5550	4863
28.51_129	2-stearoylglycerol	6087	7610	6629	5387	5972	7393	6277	6722	8745	6104	5948	7254	6355	4959	6683	6472	4822	4062	5289	4622	5665	5149	4918	5530	5081	7344	7474	7227	7258	7077	5447	5699	5149	6392
28.57_129	1-oleoylglycerol	6322	9347	6030	8366	6543	4821	7753	5906	13535	5512	11814	5795	4434	7041	54029	43999	36022	7883	13613	40669	13961	11171	10921	16762	12455	5603	8039	7467	8835	6716	11740	12140	13902	13047
28.63_204		12935	8747	13143	2783	8067	10232	7639	11846	3346	5293	52042	18347	14685	2891	58082	39040	31350	19890	3814	13638	23756	14062	19025	4508	15768	14096	9760	19066	3355	10682	11604	14123	14985	15809
28.69_399	1-stearoylglycerol	16424	17795	13913	14407	14586	20803	15050	18254	16393	17359	13717	17876	15140	15192	22209	20951	17557	10601	13595	16721	11877	13162	8485	17427	11077	23297	19994	15205	18433	15612	15671	16021	15671	15561
28.84_85		12906	5812	7947	9340	4201	11682	12749	5939	5764	5294	12542	6637	4340	5077	5552	8851	4567	5937	6132	5107	5459	5531	5408	5240	4004	4184	7399	9174	9142	10294	3748	4656	6110	5729
28.9_129		6542	6106	5831	4606	4181	5932	5398	4867	6944	5440	8251	7767	6208	4716	7692	6715	7356	5694	5693	5801	4762	4950	4433	5585	8034	3594	5003	5268	5070	4659	7415	4787	7518	5420
29.1_361		9774	8688	6417	9161	8624	3720	6894	5489	11010	5452	5950	8918	4217	6076	4982	5110	4766	3437	5909	5026	5012	2794	3553	7339	6926	5273	9500	9079	9470	11602	6961	7209	8450	7956
29.37_85		9001	4147	4667	6325	2539	9750	9860	3886	3202	3855	9727	4926	2952	2909	3406	6957	2917	4021	4172	2777	3659	4232	3798	3622	2552	2792	4662	6530	6244	7105	2697	3062	4051	3665
29.84_193		72812	105193	110657	114127	94385	92866	78726	103851	121964	81777	120577	119822	100051	86953	83200	97755	68496	96822	100397	80516	87980	77149	103157	125210	107338	94527	95149	119107	97693	108325	115744	109772	110699	102481
31.01_237	alpha-tocopherol	22505	33345	14704	20593	24771	12304	18191	5752	21302	15380	15554	18432	5901	14122	23925	22085	21323	7464	13787	26632	13872	25771	8745	22995	25435	10620	19661	17157	18549	26576	19029	22773	24389	22035
31.2_329	cholesterol	1472458	1719807	1611007	1729837	1669537	1394299	1315435	900143	1853511	1666308	2709933	2270124	1194123	1875670	3337318	3810542	3280487	2239460	3671414	3143910	2935780	3073172	2903193	4675421	3034869	1366023	1506835	1519003	1751083	1843041	2128219	2359964	2466968	2511980
31.76_458	lanosterol	2648	3583	2522	5298	1692	1921	1741	1721	2082	2707	7103	3888	1391	1266	9332	30241	9020	6615	6106	12112	7836	7762	7002	13459	7531	2437	3043	3623	3172	2806	4277	4254	4992	4620
32.14_129	campesterol	28920	51373	39573	32861	28363	28216	37866	24995	58325	30522	56906	74772	38645	68811	67176	74237	106716	59259	130477	67982	48176	87651	76543	127795	55981	30892	44643	38985	42807	38060	56482	60294	68166	66742
32.47_314		20233	15266	13557	20761	12235	2369	2377	4596	7622	3009	13650	2775	2088	10947	5384	NA	11176	NA	9759	20804	38783	31052	10540	NA	28796	NA	5419	2887	5119	3561	651	NA	NA	NA
32.79_255	ursodeoxycholic acid	21908	14569	21907	40982	48102	11712	20201	16030	12252	13115	71845	51018	48645	15213	51313	47714	183045	68852	9648	23987	17232	96426	22532	15135	31255	12844	69188	104675	12942	17363	33698	37966	54410	40079
33.04_357	β-Sitosterol	5010	10558	11957	9638	8778	5262	12234	6239	14361	5960	14449	21490	14028	21413	14686	20184	27546	22998	37418	18423	11102	20050	27144	35780	13833	5691	9057	13712	12133	8924	15421	17969	18357	18726
